# Supplementary material for: Structural characterization of NrnC identifies unifying features of dinucleases
Source: eLife journal article supplement (doi:10.7554/elife.70146), 2021-09-17
Supplement: fig2-data1 [file Figure2_source_data_2a_quantification.xlsx]

## Sheet: Sheet1
				WT							L31A
			Time (min)	Replicate 1	Replicate 2	Replicate 3	Average	Stdev		Time (min)	Replicate 1	Replicate 2	Replicate 3	Average	Stdev
			0	0.922505	0.952338	0.970533	0.948459	0.024248		0	0.967631	0.990309	0.911533	0.956491	0.0405523
			0.5	0.288562	0.334131	0.403102	0.341932	0.0576674		0.5	0.926542	0.979249	0.874522	0.926771	0.052364
			1	0.098582	0.17208	0.225265	0.165309	0.0636123		1	0.893966	0.984144	0.872932	0.917014	0.0590799
			3	0.017753	0.0332174	0.0333216	0.0280973	0.00895858		3	0.846168	0.970905	0.86739	0.894821	0.0667394
			5	0.014137	0.01749	0.0177097	0.0164456	0.00200225		5	0.807944	0.939995	0.848256	0.865398	0.0676739
			10	0.00975081	0.007632	0.00983521	0.00907267	0.00124837		10	0.719414	0.90902	0.820588	0.816341	0.0948746
			20	0.00855912	0.00778861	0.0105901	0.00897928	0.00144723		20	0.617973	0.89116	0.781669	0.763601	0.137487
				D25A							H79A
			Time (min)	Replicate 1	Replicate 2	Replicate 3	Average	Stdev		Time (min)	Replicate 1	Replicate 2	Replicate 3	Average	Stdev
			0	0.971158	0.958251	0.904609	0.944672	0.0352912		0	0.949967	0.957261	0.971301	0.95951	0.0108431
			0.5	0.97135	0.967961	0.951068	0.96346	0.0108644		0.5	0.704685	0.593229	0.626159	0.641358	0.0572609
			1	0.963796	0.957558	0.976324	0.965893	0.00955689		1	0.548604	0.483306	0.524356	0.518755	0.0330076
			3	0.967663	0.955035	0.976825	0.966508	0.0109408		3	0.290398	0.296394	0.316858	0.301217	0.0138737
			5	0.966056	0.961353	0.974485	0.967298	0.00665338		5	0.134649	0.131547	0.136811	0.134336	0.00264556
			10	0.96338	0.957581	0.976982	0.965981	0.00995894		10	0.0350583	0.0372295	0.0312382	0.0345086	0.00303324
			20	0.974425	0.974727	0.98654	0.978564	0.00690916		20	0.0130982	0.0145787	0.0106935	0.0127901	0.00196081
				K103A							H205A
			Time (min)	Replicate 1	Replicate 2	Replicate 3	Average	Stdev		Time (min)	Replicate 1	Replicate 2	Replicate 3	Average	Stdev
			0	0.966447	0.9688	0.963629	0.966292	0.00258889		0	0.953854	0.974223	0.974725	0.967601	0.0119078
			0.5	0.928374	0.919667	0.867386	0.905142	0.0329864		0.5	0.715133	0.622338	0.53163	0.623034	0.0917536
			1	0.906505	0.887852	0.826027	0.873461	0.0421244		1	0.541134	0.451973	0.301573	0.43156	0.121078
			3	0.847646	0.780431	0.745698	0.791258	0.0518289		3	0.268853	0.236411	0.0594618	0.188242	0.1127
			5	0.807419	0.730008	0.648035	0.728488	0.0797029		5	0.11428	0.141632	0.0139181	0.0899433	0.0672451
			10	0.7227	0.611785	0.476143	0.603543	0.123485		10	0.0275904	0.0521202	0.00713669	0.0289491	0.0225225
			20	0.624055	0.469188	0.278113	0.457119	0.173287		20	0.00847067	0.0196344	0.00496359	0.0110229	0.00766118
				Y151A
			Time (min)	Replicate 1	Replicate 2	Replicate 3	Average	Stdev
			0	0.979835	0.961605	0.981219	0.97422	0.0109461
			0.5	0.975585	0.967024	0.971748	0.971452	0.00428808
			1	0.973331	0.968389	0.967143	0.969621	0.00327284
			3	0.970323	0.969411	0.957554	0.965762	0.00712301
			5	0.968114	0.970623	0.950895	0.963211	0.0107389
			10	0.962257	0.97315	0.934727	0.956711	0.0198029
			20	0.96798	0.973776	0.912207	0.951321	0.0339972
