# Supplementary material for: Structural characterization of NrnC identifies unifying features of dinucleases
Source: eLife journal article supplement (doi:10.7554/elife.70146), 2021-09-17
Supplement: fig2-data2 [file Figure2_source_data_2b_quantification.xlsx]

## Sheet: Sheet1
			None							GpG							pAp
		Time (min)	Replicate 1	Replicate 2	Replicate 3	Average	Stdev		Time (min)	Replicate 1	Replicate 2	Replicate 3	Average	Stdev		Time (min)	Replicate 1	Replicate 2	Replicate 3	Average	Stdev
		0	0.986818	0.965584	0.922505	0.958302	0.0327691		0	0.970958	0.995301	0.976007	0.980755	0.0128476		0	0.972116	0.987503	0.976396	0.978671	0.00794194
		0.5	0.624523	0.592625	0.288562	0.501904	0.185446		0.5	0.645508	0.507228	0.604166	0.585634	0.0709785		0.5	0.942683	0.959511	0.923362	0.941852	0.0180887
		1	0.432336	0.340476	0.098582	0.290465	0.172406		1	0.396215	0.266125	0.388046	0.350129	0.0728639		1	0.897077	0.922229	0.879387	0.899565	0.0215289
		3	0.0689884	0.100414	0.017753	0.0623851	0.0417242		3	0.134435	0.0230858	0.088194	0.081905	0.0559404		3	0.788394	0.772218	0.753145	0.771252	0.0176442
		5	0.0176998	0.039674	0.014137	0.0238369	0.0138305		5	0.0650707	0.00730082	0.0204935	0.030955	0.0302725		5	0.649414	0.628411	0.646028	0.641284	0.0112765
		10	0.00740515	0.0140116	0.00975081	0.0103892	0.00334919		10	0.0220099	0.0090971	0.00858656	0.0132312	0.00760686		10	0.441463	0.388934	0.42653	0.418976	0.0270673
		20	0.00805501	0.013757	0.00855912	0.0101237	0.00315663		20	0.0277588	0.00660132	0.00709964	0.0138199	0.012074		20	0.153362	0.138143	0.20218	0.164562	0.0334552
