# Supplementary material for: Structural characterization of NrnC identifies unifying features of dinucleases
Source: eLife journal article supplement (doi:10.7554/elife.70146), 2021-09-17
Supplement: fig2-data3 [file Figure2_source_data_2c_quantification.xlsx]

## Sheet: Sheet1
			Replicate 1	Replicate 2	Replicate 3	Average	Stdev
		None	0.169468	0.175716	0.246676	0.197287	0.0428861
		pGpG	0.0113971	0.00298203	0	0.00479306	0.00591046
		GpG	0.250682	0.206498	0.276455	0.244545	0.0353797
		pAp	0.197036	0.186831	0.187732	0.190533	0.00564968
