# Supplementary material for: Structural characterization of NrnC identifies unifying features of dinucleases
Source: eLife journal article supplement (doi:10.7554/elife.70146), 2021-09-17
Supplement: fig2-data4 [file elife-70146-fig2-data4-v2.zip]

1 2 3 4 5 6 7 8

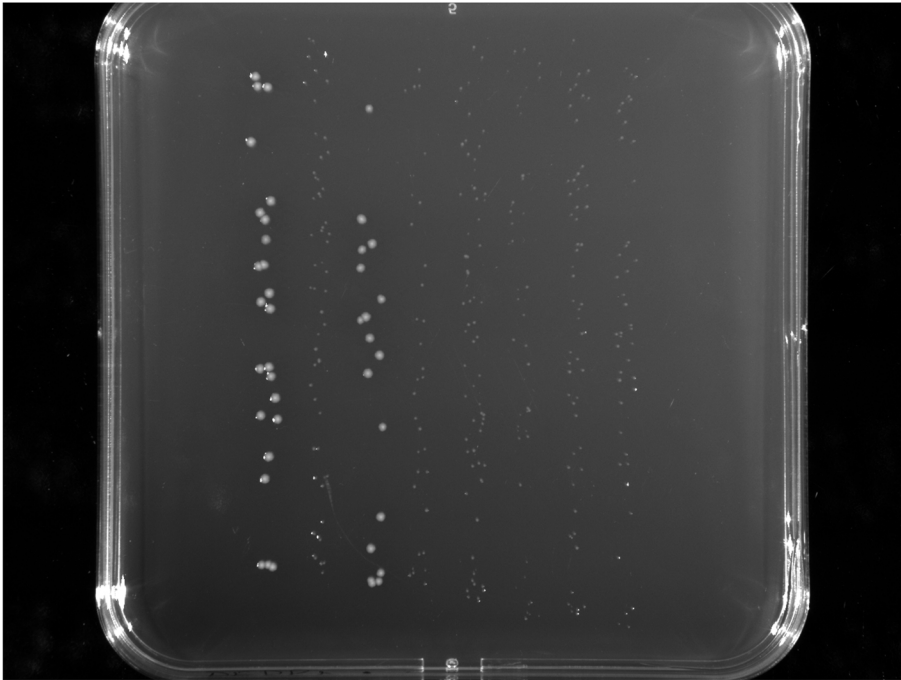

- 1 - *P. aeruginosa* PA14
- 2 - PA14  $\Delta orn$
- 3 - PA14  $\Delta orn$  + pNrnC wt
- 4 - PA14  $\Delta orn$  + pNrnC D<sup>25</sup>A
- 5 - PA14  $\Delta orn$  + pNrnC E<sup>27</sup>A
- 6 - PA14  $\Delta orn$  + pNrnC D<sup>84</sup>A
- 7 - PA14  $\Delta orn$  + pNrnC D<sup>155</sup>A
- 8 - PA14  $\Delta orn$  + pNrnC Y<sup>151</sup>A

9 10 11 12 13 14 15 16

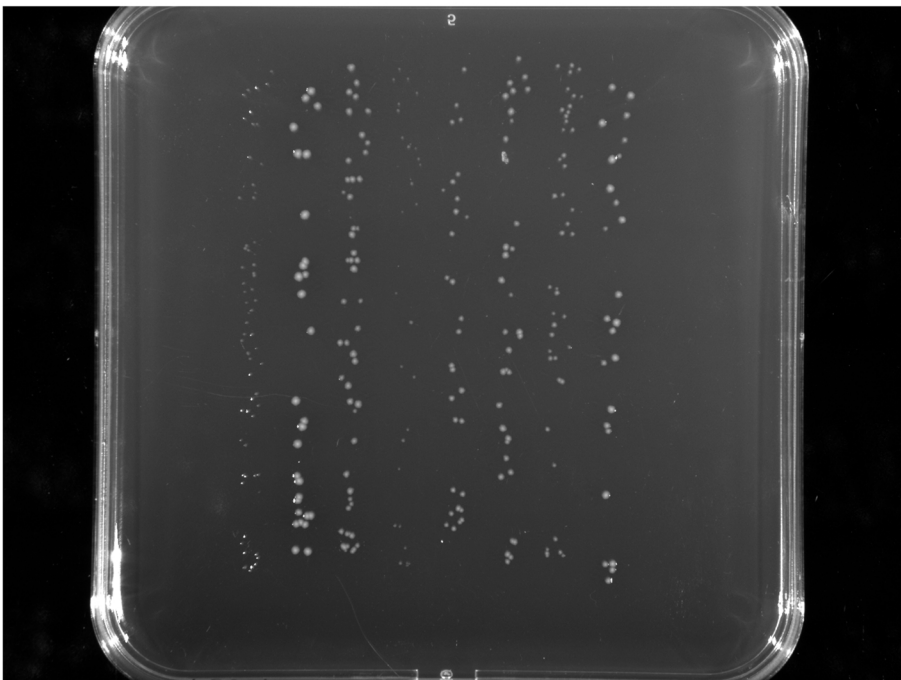

- 9 - PA14  $\Delta orn$
- 10 - PA14  $\Delta orn$  + pNrnC wt
- 11 - PA14  $\Delta orn$  + pNrnC L<sup>31</sup>A
- 12 - PA14  $\Delta orn$  + pNrnC H<sup>79</sup>A
- 13 - PA14  $\Delta orn$  + pNrnC K<sup>103</sup>A
- 14 - PA14  $\Delta orn$  + pNrnC H<sup>205</sup>A
- 15 - PA14  $\Delta orn$  + pNrnC K<sup>132</sup>A
- 16 - PA14  $\Delta orn$  + pNrnC Q<sup>135</sup>A

Figure 2D - source data 1
