# Supplementary material for: Structural characterization of NrnC identifies unifying features of dinucleases
Source: eLife journal article supplement (doi:10.7554/elife.70146), 2021-09-17

Replicate 1

Replicate 2

Replicate 3

NrnC 5 nM

Time: 0 1 5 10 20 30 60

<sup>32</sup>P-AAAAAGG----

Time: 0 1 5 10 20 30 60

<sup>32</sup>P-AAAAAGG----

Time: 0 1 5 10 20 30 60

<sup>32</sup>P-AAAAAGG----

NrnC 50 nM

<sup>32</sup>P-AAAAAGG----<sup>32</sup>P-AAAAAGG----<sup>32</sup>P-AAAAAGG----

NrnC 100 nM

<sup>32</sup>P-AAAAAGG----<sup>32</sup>P-AAAAAGG----<sup>32</sup>P-AAAAAGG----

NrnC 1000 nM

<sup>32</sup>P-AAAAAGG----<sup>32</sup>P-AAAAAGG----<sup>32</sup>P-AAAAAGG----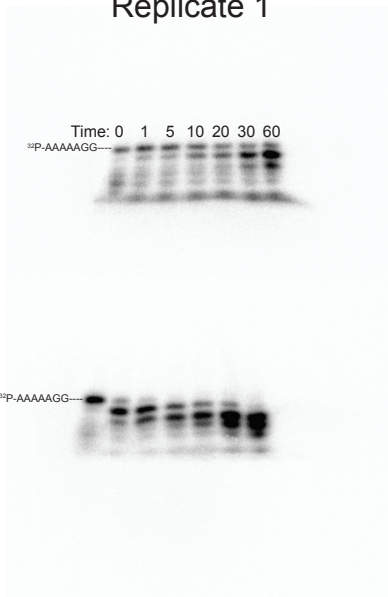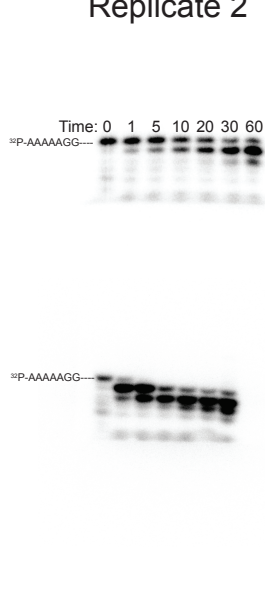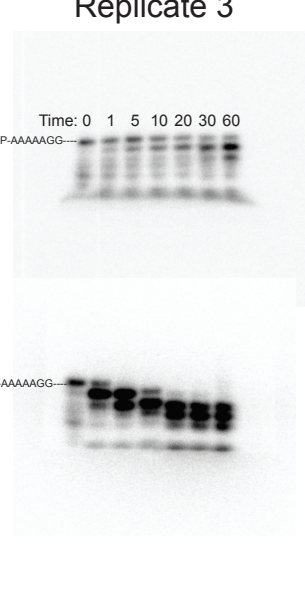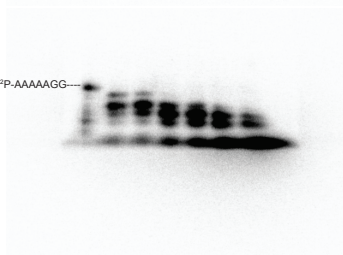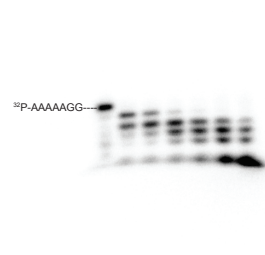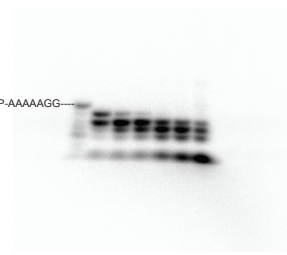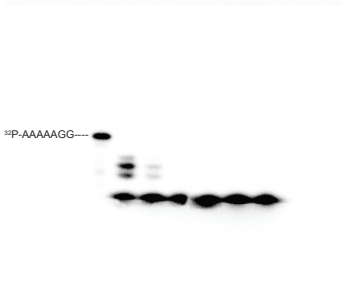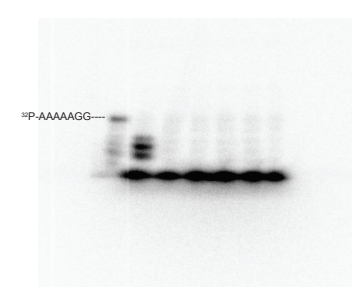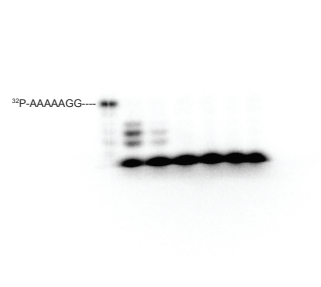

Supplement: fig5-data2 [file elife-70146-fig5-data2-v2.zip]
