# Supplementary material for: Structural characterization of NrnC identifies unifying features of dinucleases
Source: eLife journal article supplement (doi:10.7554/elife.70146), 2021-09-17
Supplement: fig5-data3 [file NrnC 2-7 mer Kd triplicate (Figure 5C).xlsx]

## Sheet: Sheet1
		32P-pGG										32P-pAAAGG
	NrnC (µM)	Replicate 1	Replicate 2	Replicate 3	Average	Stdev					NrnC (µM)	Replicate 1	Replicate 2	Replicate 3	Average	Stdev
	0.625	0.179365	0.173721	0.174571	0.175886	0.00304343					25	0.391927	0.405494	0.384723	0.394048	0.0105468
	0.3125	0.170631	0.167442	0.161717	0.166597	0.00451718					12.5	0.367552	0.350473	0.339353	0.352459	0.0142041
	0.15625	0.14964	0.155691	0.142296	0.149209	0.00670824					6.25	0.285352	0.283333	0.265643	0.27811	0.0108433
	0.078125	0.132221	0.142257	0.119507	0.131329	0.0114016					3.125	0.246158	0.226107	0.184499	0.218921	0.0314513
	0.0390625	0.111037	0.11216	0.122057	0.115085	0.00606382					1.5625	0.137335	0.149589	0.149352	0.145425	0.00700726
	0.0195312	0.096053	0.0919815	0.100875	0.0963033	0.00445223					0.78125	0.0967047	0.087341	0.082235	0.0887602	0.00733852
	0.00976563	0.0511911	0.0538932	0.0678957	0.05766	0.00896676					0.390625	0.0346157	0.0492439	0.0466661	0.0435085	0.00780855
	0.00488281	0.0251246	0.0280701	0.0406767	0.0312905	0.00826101					0.195312	0.0397988	0.0282972	0.0269825	0.0316928	0.00705064
	0.00244141	0.0346168	0.0216451	0.0223965	0.0262195	0.00728204					0.0976562	0.0187001	0.0135726	0.0145746	0.0156158	0.00271767
	0.0012207	0.0126977	0.00410263	0.0201056	0.012302	0.00800883					0.0488281	0.0157739	0.00181581	0.0188738	0.0121545	0.00908676
	0.00061035	0.00810465	0	0.0123362	0.00681363	0.00626863					0.0244141	-0.0016747	0.00605716	0.0110285	0.00513697	0.00640138
	0	0	0.00017441	0	5.81367e-05	0.000100696					0	0.00080655	-0.0020802	0.00677774	0.0018347	0.00451759
		32P-pAGG										32P-pAAAAGG
	NrnC (µM)	Replicate 1	Replicate 2	Replicate 3	Average	Stdev					NrnC (µM)	Replicate 1	Replicate 2	Replicate 3	Average	Stdev
	25	0.254374	0.250377	0.254161	0.25297	0.00224867					25	0.410475	0.40197	0.439286	0.417244	0.0195569
	12.5	0.23646	0.224133	0.240743	0.233779	0.00862382					12.5	0.396757	0.424234	0.416018	0.412336	0.0141037
	6.25	0.200217	0.204153	0.200413	0.201594	0.00221808					6.25	0.345787	0.381101	0.373455	0.366781	0.018579
	3.125	0.166249	0.156016	0.143603	0.155289	0.0113402					3.125	0.208695	0.270076	0.220387	0.233053	0.0325915
	1.5625	0.0876649	0.0975658	0.101795	0.0956753	0.00725234					1.5625	0.19792	0.238517	0.230972	0.22247	0.0215929
	0.78125	0.0493974	0.0558171	0.0522	0.0524715	0.00321847					0.78125	0.141862	0.169109	0.166181	0.15905	0.0149573
	0.390625	0.0250803	0.0317957	0.0307609	0.0292123	0.00361561					0.390625	0.0761122	0.0935999	0.0566217	0.0754446	0.0184982
	0.195312	0.0152966	0.0184014	0.0173379	0.017012	0.0015779					0.195312	0.056828	0.0675898	0.0412228	0.0552135	0.0132574
	0.0976562	0.00719716	0.00910304	0.0100427	0.00878096	0.00144984					0.0976562	0.0401763	0.0397899	0.0458784	0.0419482	0.00340913
	0.0488281	0.00184055	0.00075248	0.00648965	0.00302756	0.00304722					0.0488281	0.0244119	0.0335614	0.0234785	0.0271506	0.00557149
	0.0244141	-0.0007138	0.00057067	0.00377071	0.00120919	0.00230944					0.0244141	0.0232841	0.018284	0.0233685	0.0216455	0.00291147
	0	-0.0063086	-0.0132214	-0.0064812	-0.0086704	0.00394223					0	0.0123526	0.00475443	0.00246321	0.00652342	0.00517659
		32P-pAAGG										32P-pAAAAAGG
	NrnC (µM)	Replicate 1	Replicate 2	Replicate 3	Average	Stdev					NrnC (µM)	Replicate 1	Replicate 2	Replicate 3	Average	Stdev
	25	0.272665	0.25535	0.252318	0.260111	0.0109773					37	0.401746	0.482146	0.474105	0.452666	0.0442805
	12.5	0.2449	0.238068	0.214438	0.232469	0.0159843					18.5	0.370451	0.445114	0.441734	0.419099	0.0421651
	6.25	0.183878	0.174075	0.17615	0.178034	0.005166					9.25	0.380515	0.458183	0.465545	0.434748	0.0471108
	3.125	0.157125	0.137565	0.123627	0.139439	0.0168275					4.625	0.378463	0.438613	0.434665	0.417247	0.033646
	1.5625	0.0808196	0.0784186	0.0804703	0.0799028	0.00129721					2.3125	0.409903	0.411776	0.391427	0.404369	0.0112466
	0.78125	0.0493889	0.044061	0.0453035	0.0462511	0.0027875					1.15625	0.334139	0.327066	0.304884	0.32203	0.0152638
	0.390625	0.00796808	0.022266	0.0212334	0.0171558	0.00797353					0.578125	0.231449	0.216809	0.215709	0.221322	0.00878734
	0.195312	0.00284222	0.0105346	0.00857817	0.00731831	0.00399793					0.289062	0.167126	0.146731	0.128476	0.147445	0.0193348
	0.0976562	0.00121162	0.00292065	0.00024668	0.00145965	0.00135413					0.144531	0.0945139	0.0835123	0.0901703	0.0893989	0.00554125
	0.0488281	-0.0030445	-0.0084852	0.00230032	-0.00307646	0.00539283					0.0722656	0.0741703	0.0553546	0.0596872	0.0630707	0.00985362
	0.0244141	-0.003008	-0.0051333	-0.0060218	-0.00472103	0.00154862					0.0361328	0.0397844	0.0290923	0.0359438	0.0349402	0.00541626
	0	-0.0107884	-0.0137174	-0.0074218	-0.0106425	0.00315033					0	0.0236512	0.0128321	0.0273552	0.0212795	0.00754649
