# Supplementary material for: Structural characterization of NrnC identifies unifying features of dinucleases
Source: eLife journal article supplement (doi:10.7554/elife.70146), 2021-09-17
Supplement: fig5-figsupp1-data1 [file NrnC pGpG-substrate competition (F5_S1).xlsx]

## Sheet: Sheet1
					NrnC pGpG-substrate competition
						Replicate 1	Replicate 2	Replicate 3	Average	Stdev
					None	0.21737	0.204311	0.156432	0.192704	0.0320839
					pGG	0	0	0	0	0
					pAGG	0.072274	0.0517617	0.0390965	0.0543774	0.0167427
					pAAGG	0.109506	0.0995424	0.0972122	0.102087	0.00652971
					pAAAGG	0.126958	0.107214	0.103884	0.112685	0.0124722
					pAAAAGG	0.147917	0.131004	0.126428	0.135116	0.0113193
					pAAAAAGG	0.0920197	0.0987788	0.0864206	0.0924064	0.00618814
