# Supplementary material for: Structural characterization of NrnC identifies unifying features of dinucleases
Source: eLife journal article supplement (doi:10.7554/elife.70146), 2021-09-17
Supplement: fig5-figsupp3-data1 [file elife-70146-fig5-figsupp3-data1-v2.zip]

Replicate 1

Time: 0 0.5 1 3 5 10 20  
27mer----

3'overhang  
dsDNA

Replicate 2

Time: 0 0.5 1 3 5 10 20  
27mer-----  
17mer-----  
12mer-----

Replicate 3

Time: 0 0.5 1 3 5 10 20  
27mer-----  
17mer-----  
12mer-----

Time: 0 0.5 1 3 5 10 20  
27mer-----

5'overhang  
dsDNA

Time: 0 0.5 1 3 5 10 20  
27mer-----  
17mer-----  
12mer-----

Time: 0 0.5 1 3 5 10 20  
27mer-----  
17mer-----  
12mer-----
