# Supplementary figures and images for: Structural characterization of NrnC identifies unifying features of dinucleases
Source: eLife journal article supplement (doi:10.7554/elife.70146), 2021-09-17

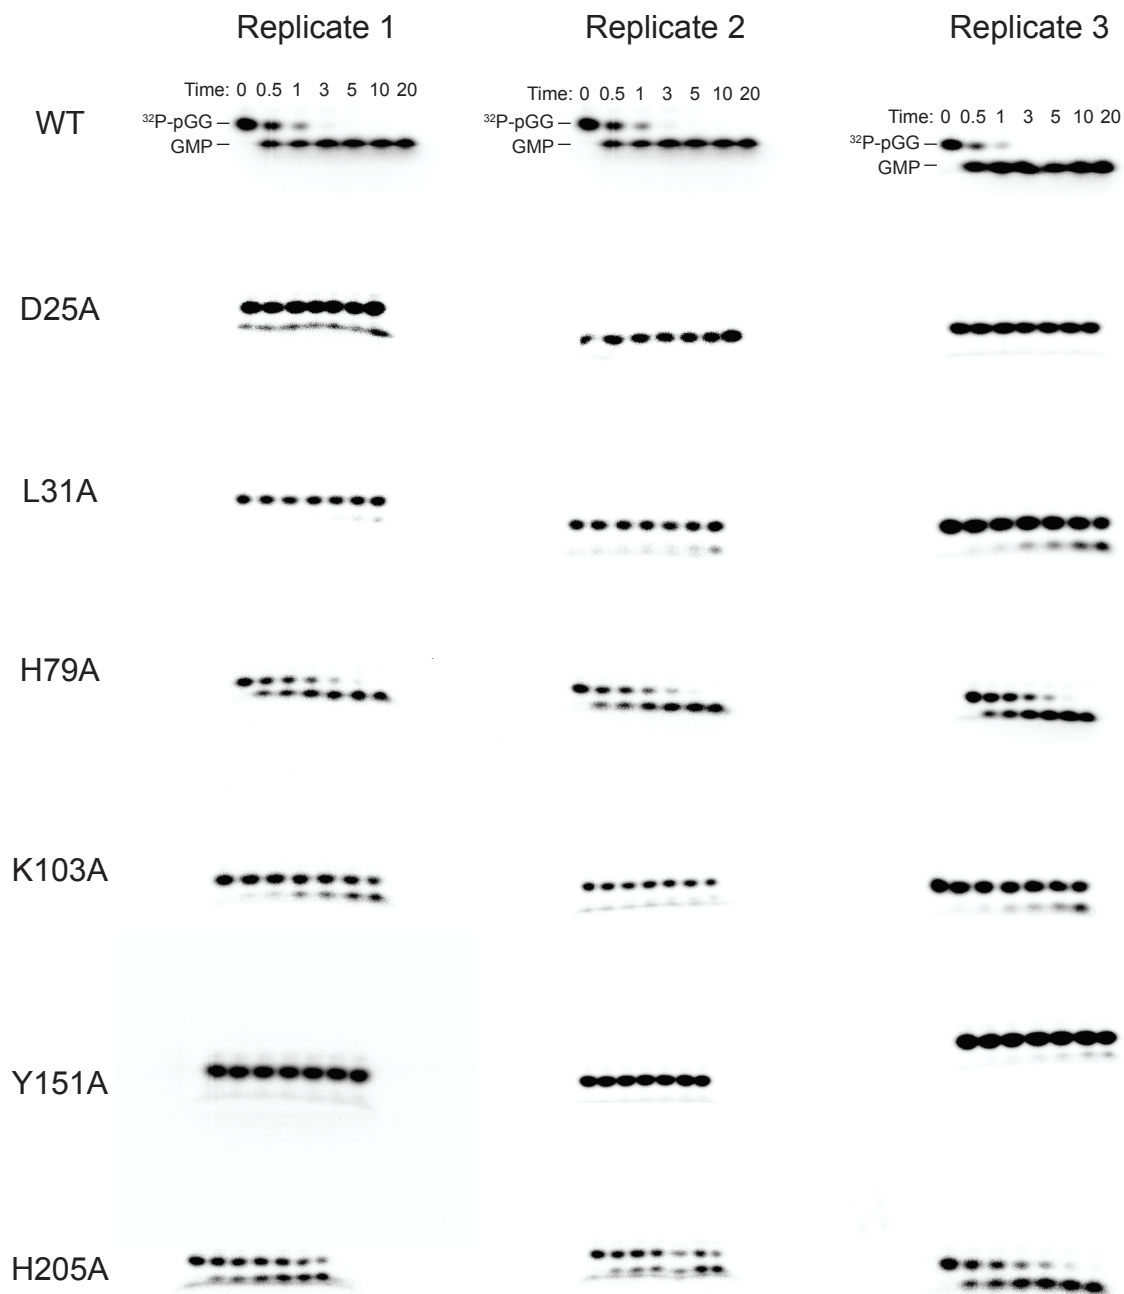

Supplement: fig2-data1 [file elife-70146-fig2-data1-v3.zip]

Replicate 1

Replicate 2

Replicate 3

WT

Time: 0 0.5 1 3 5 10 20  
 $^{32}\text{P}$ -pGG —  
GMP —

Time: 0 0.5 1 3 5 10 20

Time: 0 0.5 1 3 5 10 20

GpG

pAp

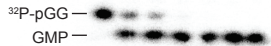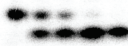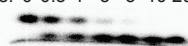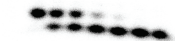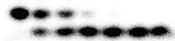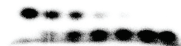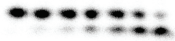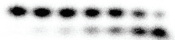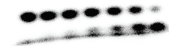

Supplement: fig2-data2 [file elife-70146-fig2-data2-v2.zip]

## Replicate 1

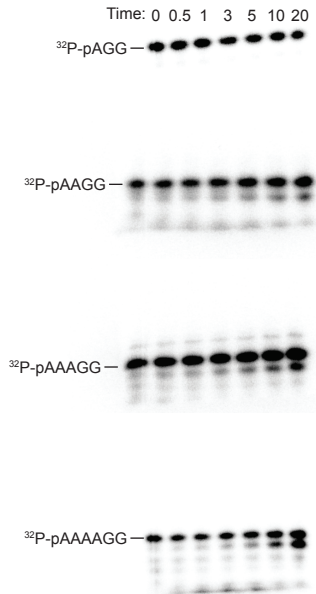

## Replicate 2

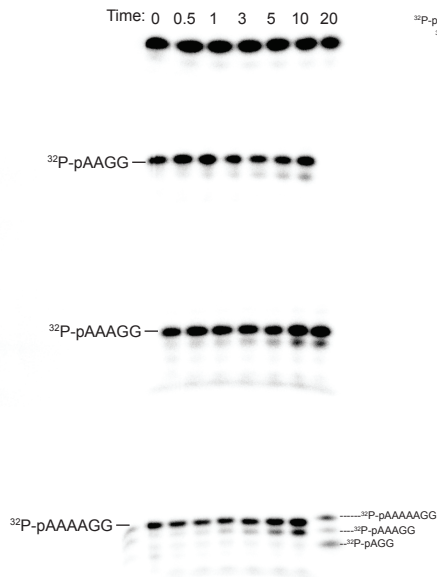

## Replicate 3

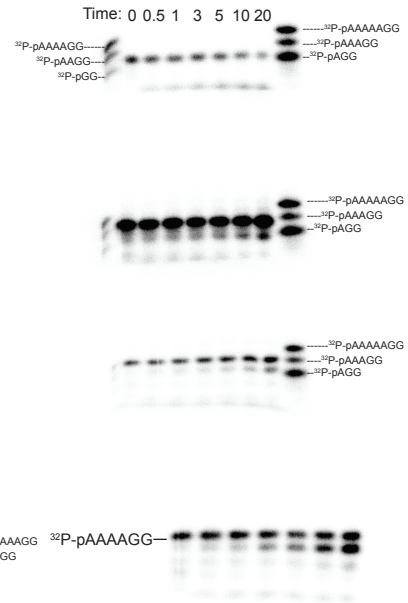

Supplement: fig5-data1 [file elife-70146-fig5-data1-v2.zip]

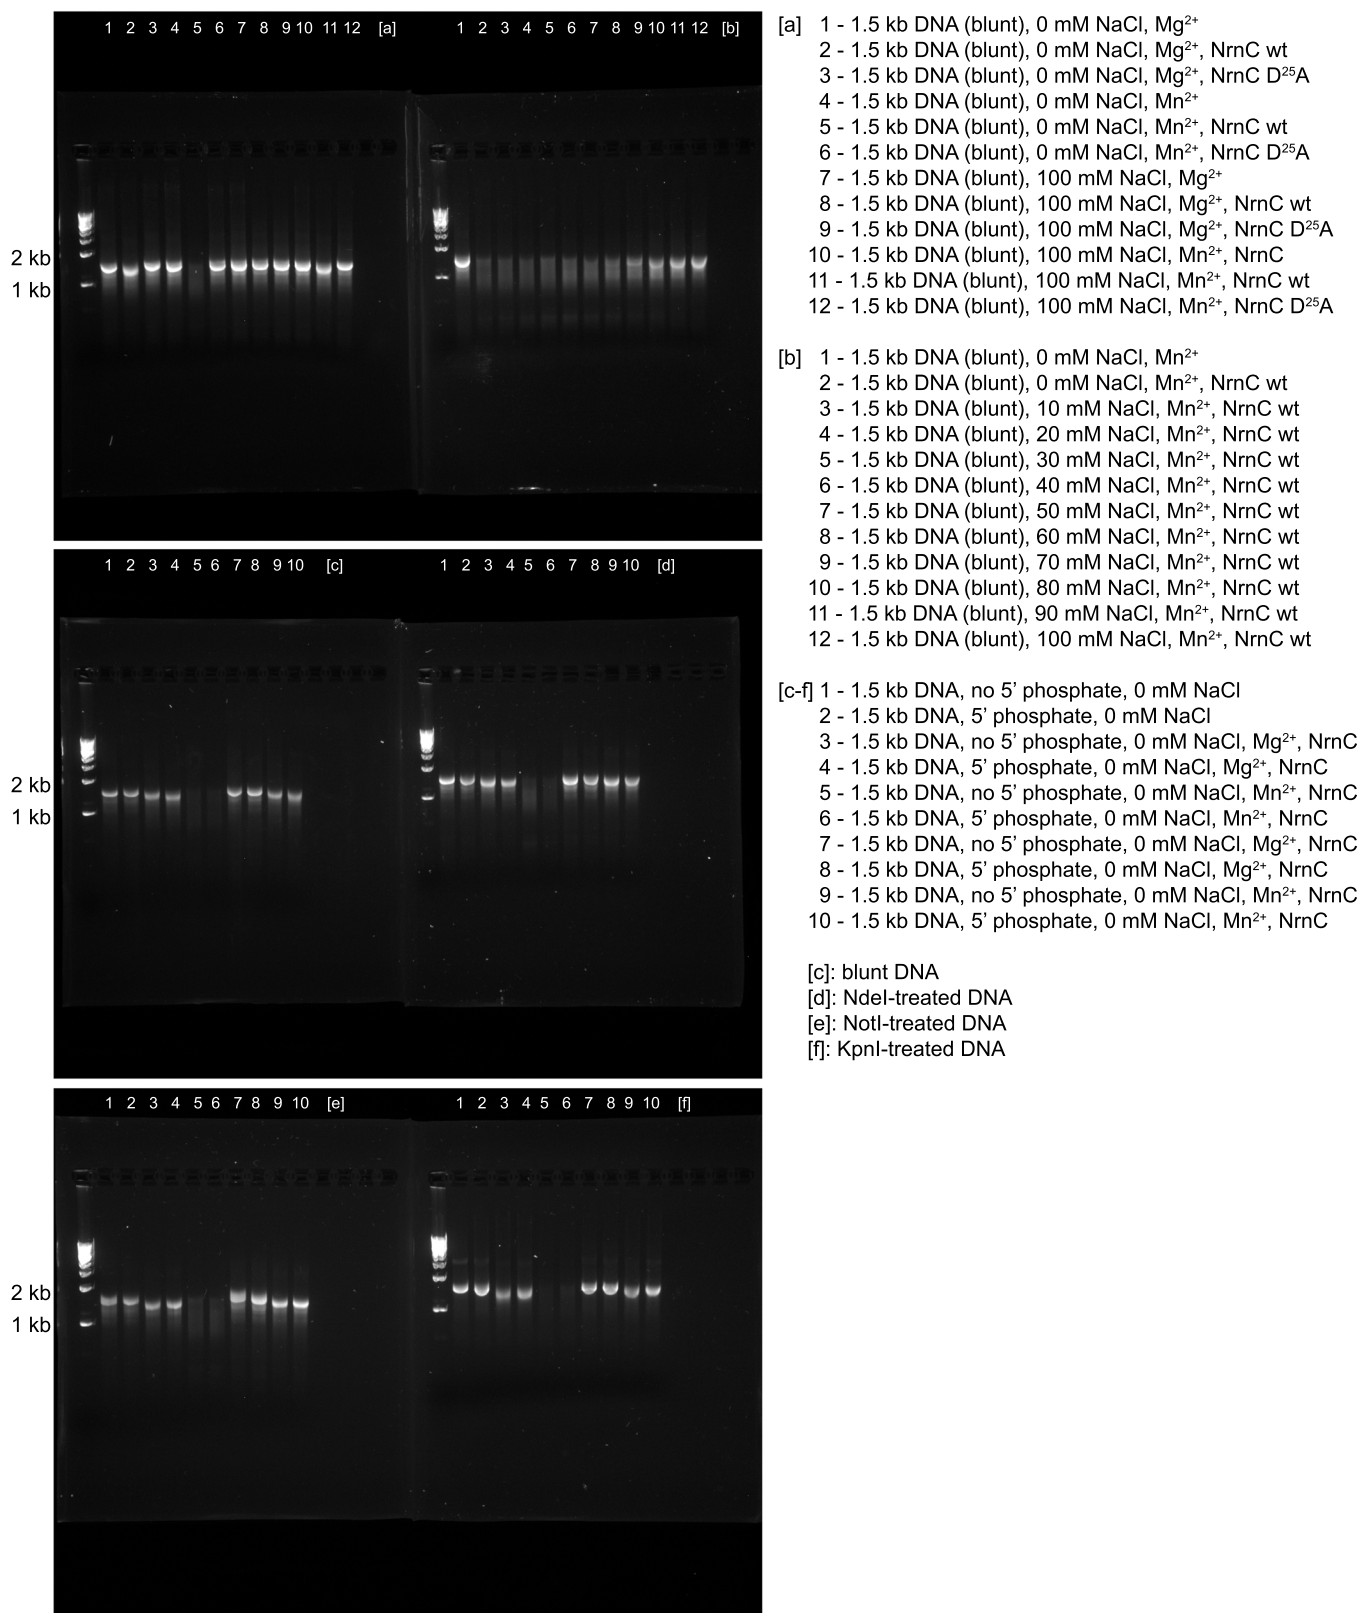

Figure 5 - figure supplement 2 - source data 4

Supplement: fig5-figsupp2-data1 [file elife-70146-fig5-figsupp2-data1-v2.zip]

Replicate 1

3'overhang  
dsRNA

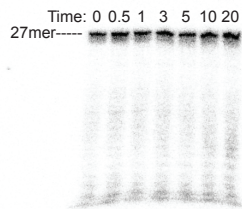

Replicate 2

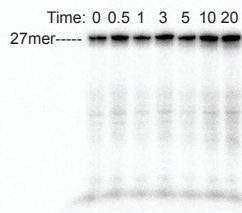

Replicate 3

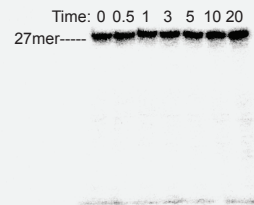

5'overhang  
dsRNA

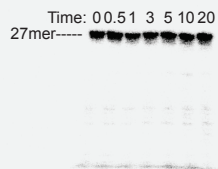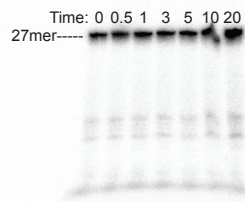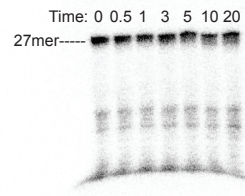

Supplement: fig5-figsupp3-data2 [file elife-70146-fig5-figsupp3-data2-v3.zip]
